# Supplementary material
Source: publisher site journal article supplement (https://www.dovepress.com/article/360871)
Supplement: Supplementary file 1 [file get_supplementary_file.php]

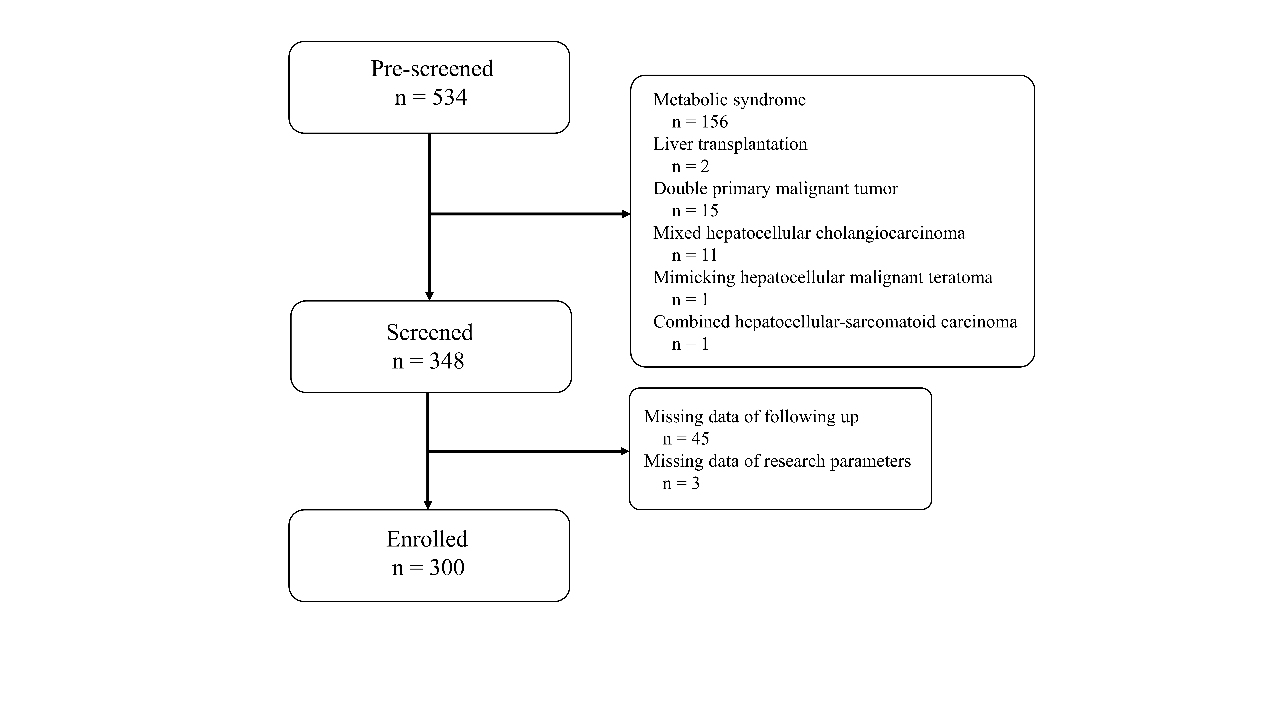
**Fig. S1**

Flow chart for screening eligible patients.


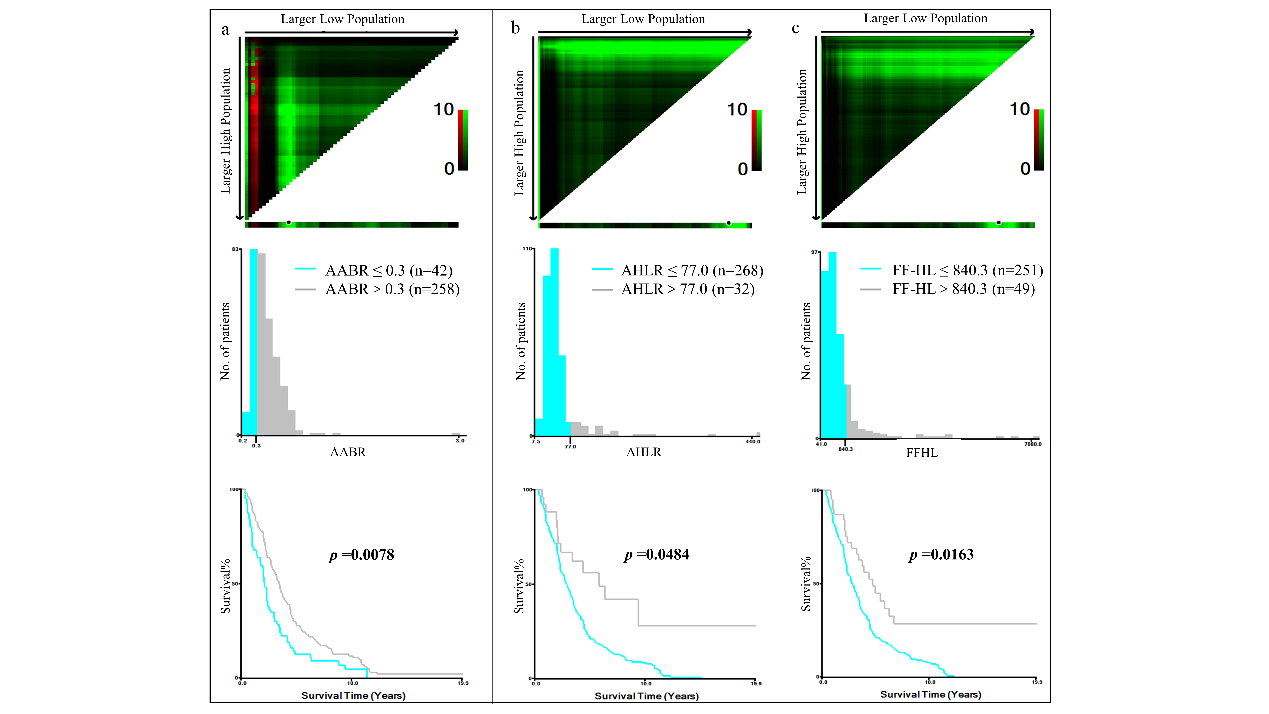
**Fig. S2**

X-tile analysis to determine optimal cut-off values for AABR (a), AHLR (b), FF-HL (c) for 20- year OS. AABR (albumin: apolipoprotein B) ratio, AHLR (albumin: high-density lipoproteins concentrations) ratio, FF-HL (free fatty acid: high-density lipoproteins concentrations).


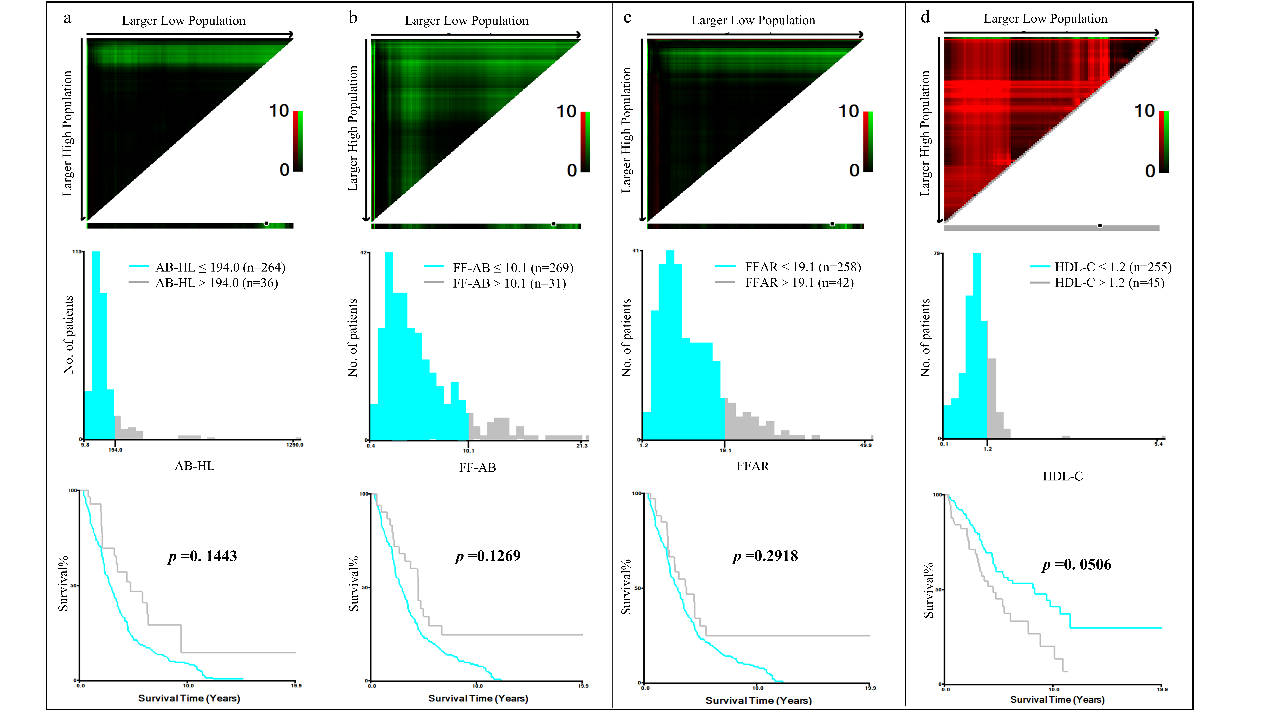
**Fig. S3**

X-tile analysis to determine optimal cut-off values of AB-HL (a), FF-AB (b), FFAR (c), and HD-C (d) for 20-year OS. AB-HL (apolipoprotein B: high-density lipoproteins concentrations) ratio, FF-AB (free fatty acid: apolipoprotein B) ratio, FFAR (free fatty acid: albumin) ratio, HDL-C (high density lipoprotein cholesterol).


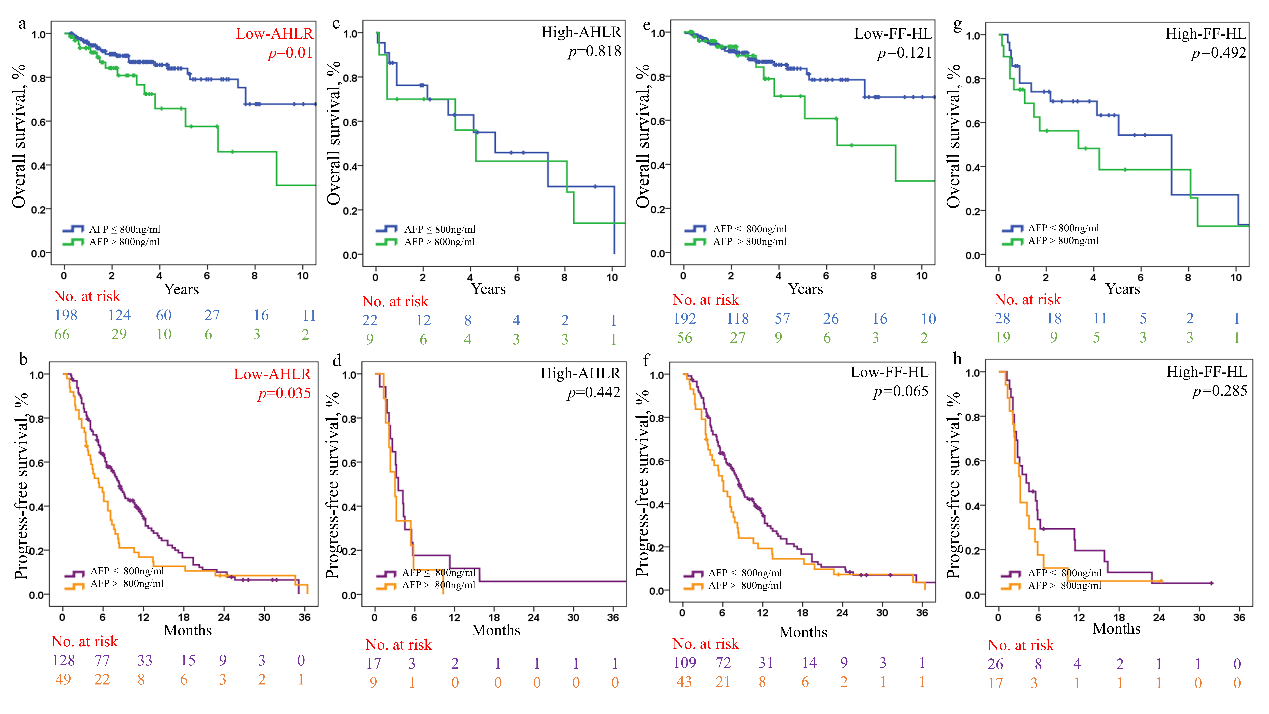
**Fig. S4**

Comparison of AFP ("≥800ng/mL" and "<800ng/mL") in OS (a, c, e, g) and PFS (b, d, f, h) in high and low levels of AHLR and FF-HL groups, respectively. FP alpha fetoprotein, OS overall survival, PFS progress-free survival, AHLR (albumin: high-density lipoproteins) ratio, FF-HL (free fatty acid: high-density lipoproteins) ratio.


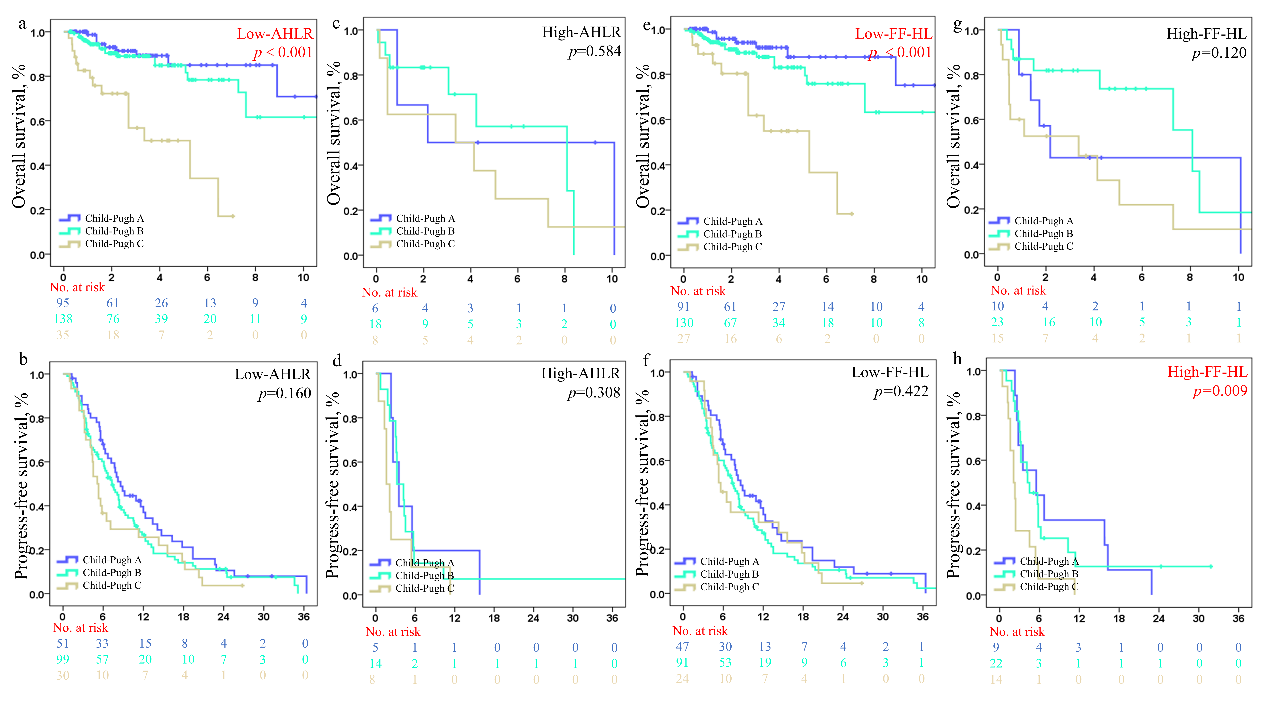
**Fig. S5**

Comparison of Child-Pugh score in OS (a, c, e, g) and PFS (b, d, f, h) in high and low levels of AHLR and FF-HL groups, respectively. AHLR (albumin: high-density lipoproteins) ratio, FF-HL (free fatty acid: high-density lipoproteins) ratio.


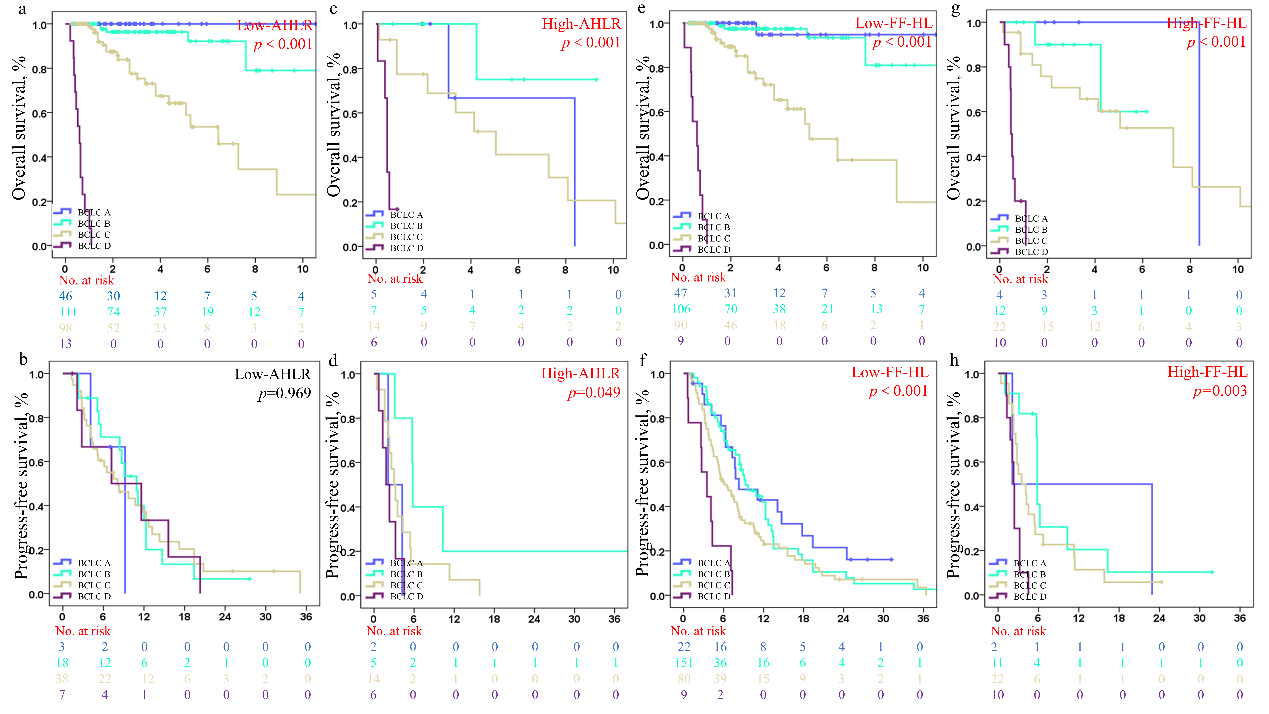
**Fig. S6**

Comparison of BCLC system in OS (a, c, e, g) and PFS (b, d, f, h) in high and low levels of AHLR and FF-HL groups, respectively. BCLC Barcelona Clinic Liver Cancer, AHLR (albumin: high-density lipoproteins) ratio, FF-HL (free fatty acid: high-density lipoproteins) ratio.


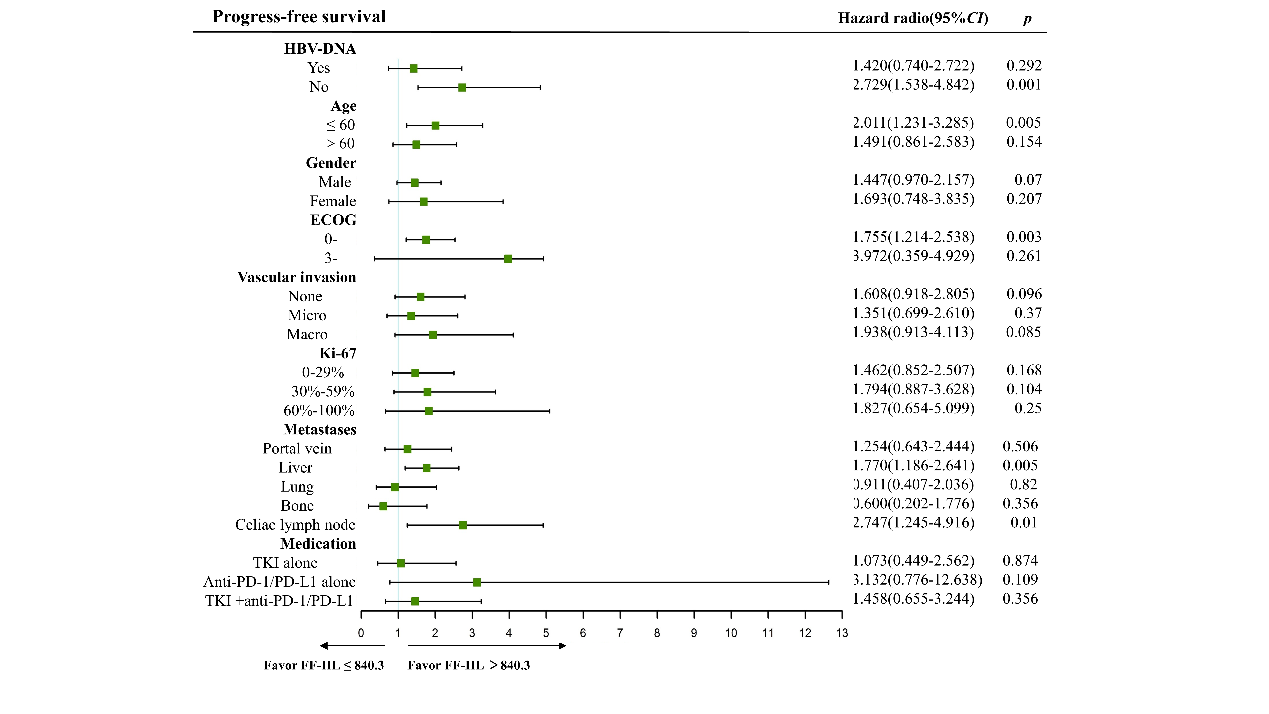
**Fig. S7**

Subgroup analysis using univariate Cox regression was performed to assess the ability of FF- HL to discriminate progress-free survival in patients with different clinical characteristics.

. CI confidence interval, ECOG Eastern Oncology Collaboration group, TKI Tyrosine Kinase Inhibitor, PD-1/PD-L1 programmed cell death protein 1 and its ligand, FF-HL (free fatty acid: high-density lipoproteins) ratio.


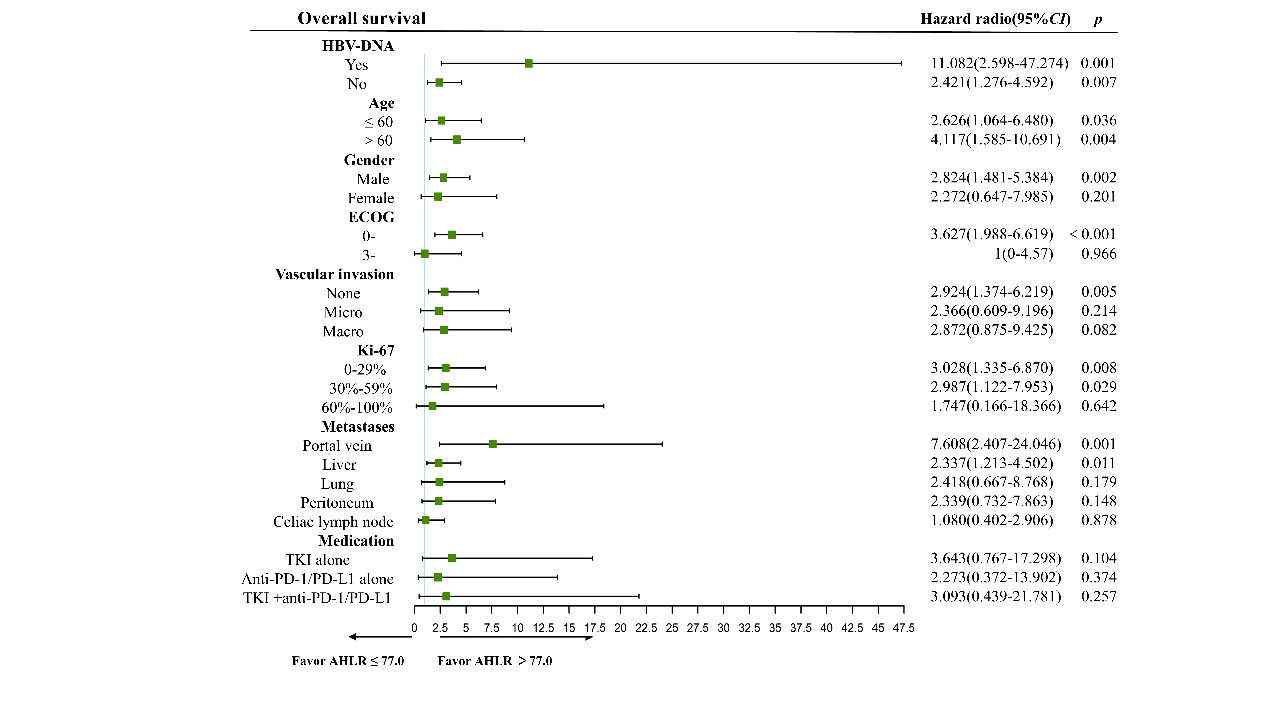
**Fig. S8**

Subgroup analysis using univariate Cox regression was performed to assess the ability of AHLR to discriminate overall survival in patients with different clinical characteristics.

. CI confidence interval, ECOG Eastern Oncology Collaboration group, TKI Tyrosine Kinase Inhibitor, PD-1/PD-L1 programmed cell death protein 1 and its ligand, AHLR (albumin: high-density lipoproteins) ratio.


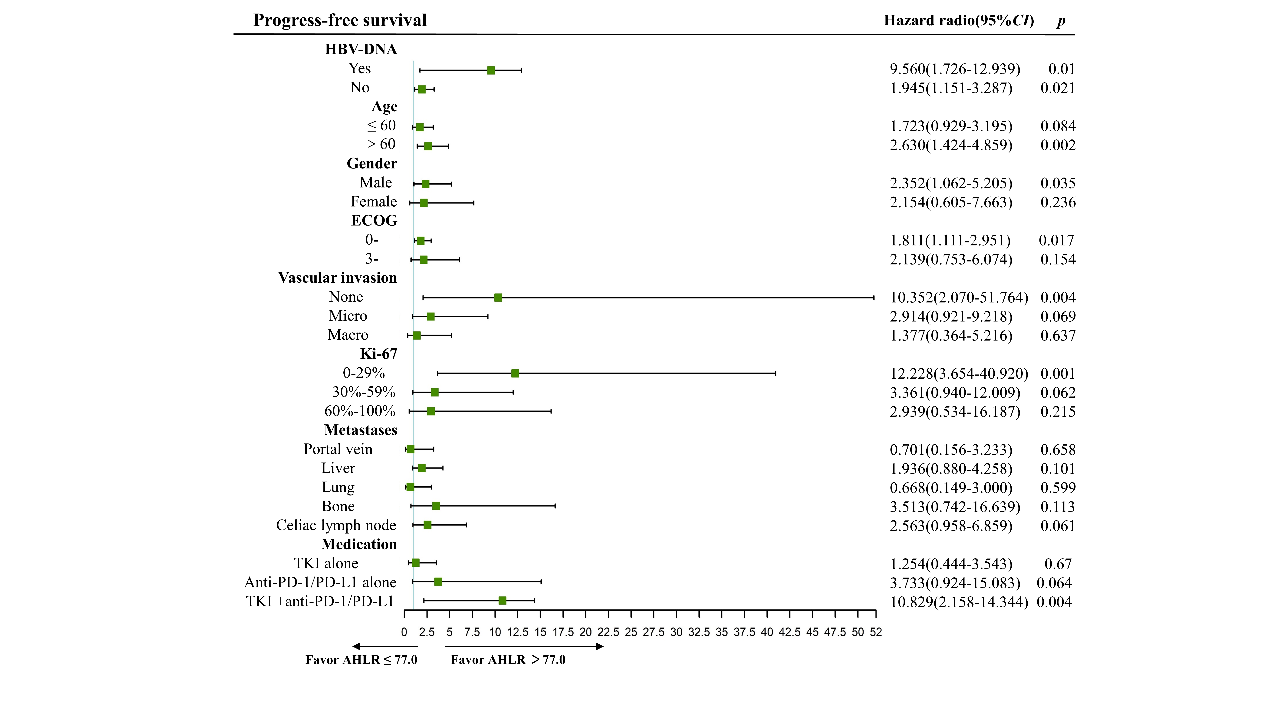
**Fig. S9**

Subgroup analysis using univariate Cox regression was performed to assess the ability of AHLR to discriminate progress-free survival in patients with different clinical characteristics.

. CI confidence interval, ECOG Eastern Oncology Collaboration group, TKI Tyrosine Kinase Inhibitor, PD-1/PD-L1 programmed cell death protein 1 and its ligand, AHLR (albumin: high-density lipoproteins) ratio.


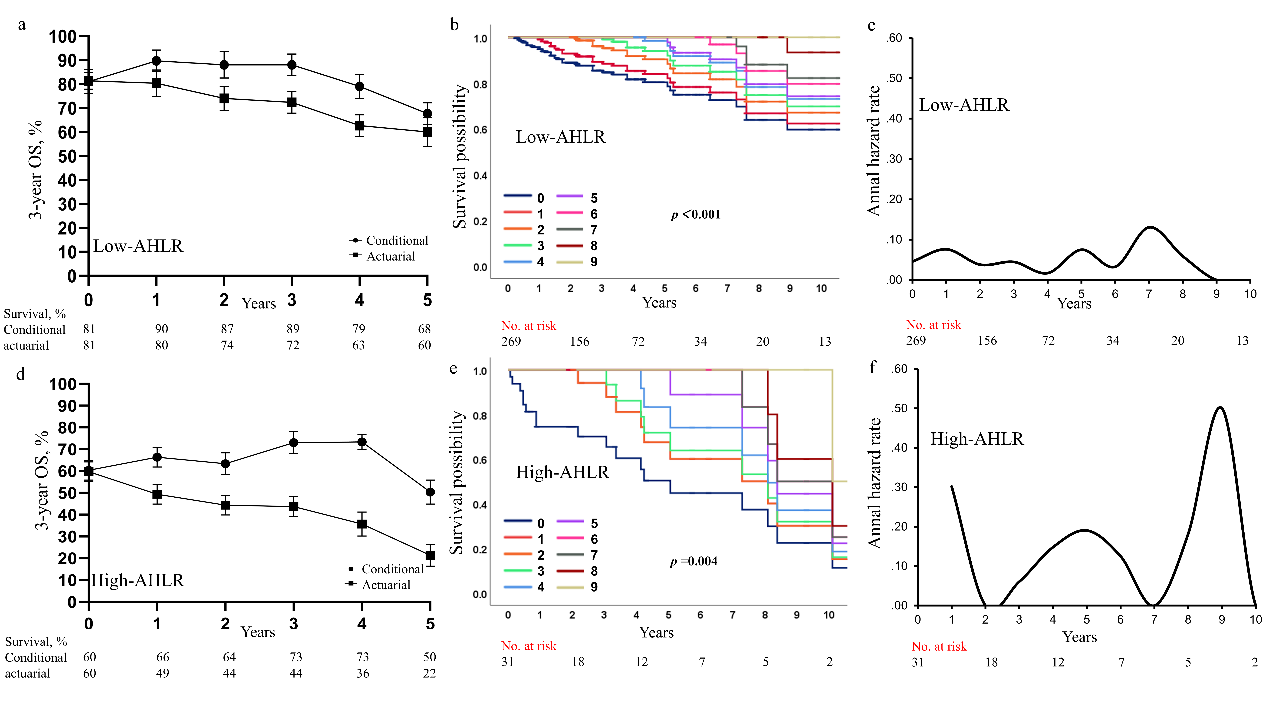
**Fig. S10**

Overall survival and conditional OS curves for the low-level (a-c) and the high-level (d-f) AHLR group. 3-year conditional OS and 3-year actuarial OS in low-level (a) and high level (d) AHLR groups; conditional OS curves for 1-9 years of survival, respectively in low-level (b) and high-level (d) AHLR groups; Smoothed hazard plot for annual rate of death in low-level (c) and high level (f) AHLR groups. AHLR (albumin: high-density lipoproteins) ratio.


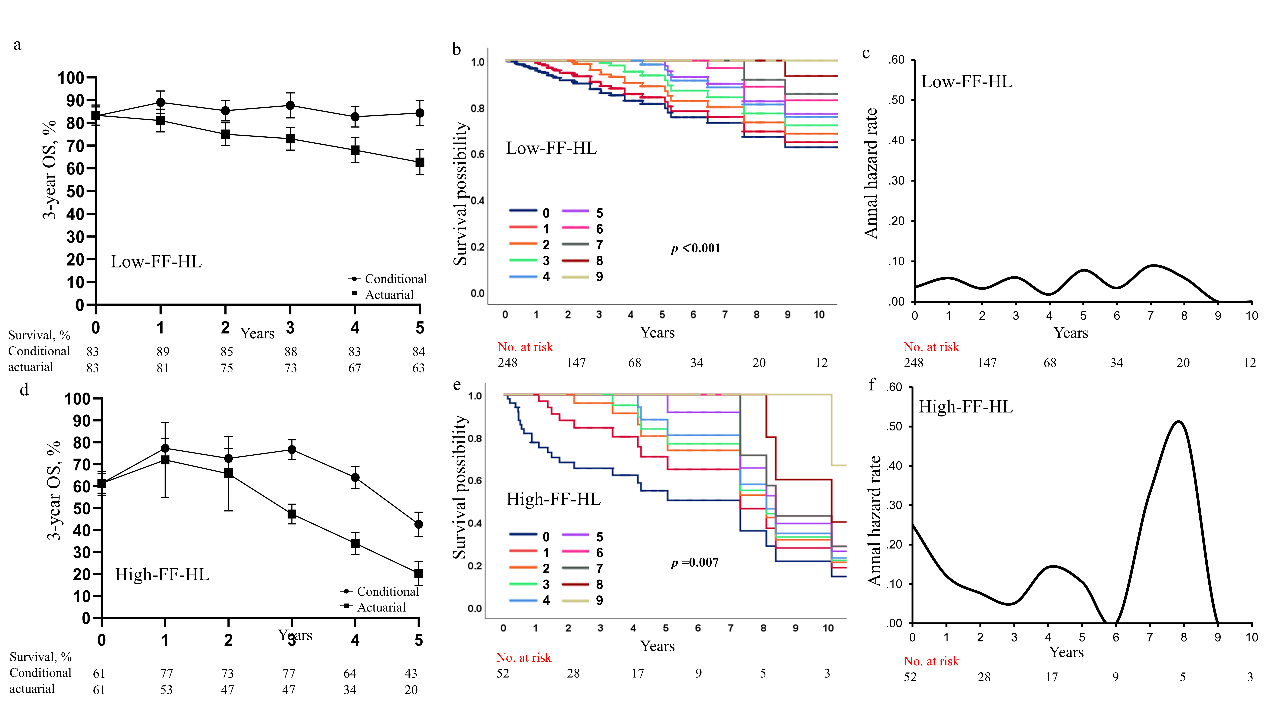
**Fig. S11**

Overall survival and conditional OS curves for the low-level (a-c) and the high-level (d-f) FF-HL group. 3-year conditional OS and 3-year actuarial OS in low-level (a) and high level (d) FF-HL groups; conditional OS curves for 1-9 years of survival, respectively in low-level (b) and high-level (d) FF-HL groups; Smoothed hazard plot for annual rate of death in low-level (c) and high level (f) FF-HL groups. FF-HL (free fatty acid: high-density lipoproteins) ratio.
